1 **A systematic genotype-phenotype map for missense variants in the human**  
2 **intellectual disability-associated gene *GDI1***

3 Rachel A. Silverstein<sup>1,2,3,5</sup>, Song Sun<sup>1,2,3,4,6</sup>, Marta Verby<sup>1,2,3</sup>, Jochen Weile<sup>1,2,3,4</sup>, Yingzhou  
4 Wu<sup>1,2,3,4</sup>, Marinella Gebbia<sup>1,2,3</sup>, Iosifina Fotiadou<sup>1,2,3,4</sup>, Julia Kitaygorodsky<sup>1, 2, 3,4</sup>, Frederick P.  
5 Roth<sup>1,2,3,4,\*</sup>

6 **Author affiliations**

- 7 1. Lunenfeld-Tanenbaum Research Institute, Sinai Health, Toronto, ON M5G 1X5, Canada  
8 2. The Donnelly Centre, University of Toronto, Toronto, ON M5S 3E1, Canada  
9 3. Department of Molecular Genetics, University of Toronto, Toronto, ON M5S 3E1,  
10 Canada  
11 4. Department of Computer Science, University of Toronto, Toronto, ON M5S 2E4, Canada  
12 5. Present address: Division of Medical Sciences, Harvard Medical School, 260 Longwood  
13 Ave, Boston, MA 02115, USA  
14 6. Present address: Analytical Sciences, Sanofi Pasteur, Toronto, ON M2R 3T4, Canada  
15 • Correspondence should be addressed to F.P.R. via [fritz.roth@utoronto.ca](mailto:fritz.roth@utoronto.ca)

16

17

18

19

20

21

22

23

24

## 25 **Abstract**

26 Next generation sequencing has become a common tool in the diagnosis of genetic diseases.  
27 However, for the vast majority of genetic variants that are discovered, a clinical interpretation is  
28 not available. Variant effect mapping allows the functional effects of many single amino acid  
29 variants to be characterized in parallel. Here, we combine multiplexed functional assays with  
30 machine learning to assess the effects of amino acid substitutions in the human intellectual  
31 disability-associated gene, *GDII*. We show that the resulting variant effect map can be used to  
32 discriminate pathogenic from benign variants. Our variant effect map recovers known  
33 biochemical and structural features of *GDII* and reveals additional aspects of *GDII* function. We  
34 explore how our functional assays can aid in the interpretation of novel *GDII* variants as they are  
35 discovered, and to re-classify previously observed variants of unknown significance.

36

## 37 **Background**

38 Next-generation sequencing is now routinely practiced in the diagnosis of genetic  
39 conditions. However, the usefulness of these methods is limited by our ability to interpret the  
40 genetic variants that are discovered. The Genome Aggregation Database (gnomAD) (1), has  
41 amassed over 4.6 million unique missense variants present in the human population. Of these  
42 missense variants, 99% are rare (minor allele frequency < 0.5%) (2) and only 13% have a  
43 definitive clinical interpretation available on ClinVar (3). Therefore, methods to close the gap  
44 between variant identification and interpretation are needed.

45 Several approaches to variant interpretation are available, including genome wide  
46 association studies (GWAS), family segregation analysis, functional assays, and computational

47 prediction of variant effects. Of these, GWAS and computational prediction can both be used to  
48 interpret data at a scale commensurate with the numbers of human genetic variants. However,  
49 GWAS is of limited value for the interpretation of rare variants due to limited statistical power  
50 and error in associations that is increased due to small sample sizes (4). Current computational  
51 prediction approaches are considered at best weak evidence for clinical variant interpretation (5).  
52 Functional assays have traditionally been used to test variants on an individual basis, but these  
53 experiments are resource-intensive and this evidence is unlikely to be available at the time a  
54 newly-discovered variant is first classified. However, it has become possible to perform  
55 multiplexed assays of variant effect (MAVE), enabling the testing of functional effects for large  
56 numbers of missense variants in parallel (2,6–8). For example, a framework for variant effect  
57 mapping of human genes by complementation in *S. cerevisiae* has been previously described and  
58 applied to multiple genes (8–10). This framework has been shown to identify, at stringent  
59 confidence thresholds (90% precision), two to three times more pathogenic variants than are  
60 identified by computational prediction alone (8–10). Here, we apply this framework to carry out  
61 large-scale testing of missense variants of human *GDII*, one of multiple genes on the X  
62 chromosome that have been found to contain mutations causing X-linked non-syndromic  
63 intellectual disability (11).

64         The *GDII* gene encodes the protein GDI1 (Rab GDP dissociation inhibitor alpha). In  
65 mammals, GDI1 is expressed primarily in the brain and is necessary for the control of endocytic  
66 and exocytic pathways in neurons and astrocytes through the spatial and temporal control of  
67 numerous Rab proteins (12,13). GDI1 functions to extract inactive GDP-bound Rab from  
68 membranes by binding and solubilizing the geranylgeranyl anchor (a post-translational  
69 modification at C-terminal cysteine residues which anchors Rabs to membranes) (14). *GDII*-null

70 mouse models show deficits in short- and long-term synaptic plasticity and behavioral  
71 phenotypes including alteration of hippocampus-dependent forms of short-term memory, spatial  
72 working memory and associative fear-related memory (12). In humans, *GDII* loss-of-function  
73 variants can cause non-syndromic intellectual disability (ID), characterized by cognitive  
74 impairment in the absence of other symptoms or physical anomalies (11). The form of ID caused  
75 by *GDII* variants follows an X-linked semi-dominant pattern of inheritance, with hemizygous  
76 males being most severely affected and female carriers showing milder or no symptoms (15,16).

77 As a common condition which has been estimated to affect up to 3% of the general  
78 population (11), ID presents a diagnostic challenge due to its many potential causes. Alterations  
79 in over 700 genes have been associated with ID, few of which are frequently-occurring (17,18).  
80 Separating causal from benign genetic variation in ID patients is therefore a significant clinical  
81 challenge. Indeed, although an etiological diagnosis brings substantial benefits for patients and  
82 their families (19), including more accurate prognosis, genetic counselling on recurrence risk,  
83 and earlier access to resources within the community and specialized education programs, only  
84 ~30% of ID patients receive an etiological diagnosis (20,21). Proactive functional testing for  
85 variants in genes associated with ID could aid in the identification of causal variants and  
86 facilitate earlier etiological diagnosis.

87 Here, we present large-scale measurements of the functional effects of missense variation  
88 in *GDII*. Variant assay results are consistent with our knowledge of *GDII* function. A  
89 comparison of variant scores with ClinVar annotations suggests that the map will prove useful in  
90 assigning pathogenicity to genetic variation.

91

92 **Results**

### 93 **Multiplexed yeast complementation efficiently identifies damaging *GDII* variants**

94 To efficiently test the deleteriousness of *GDII* missense variants, we used a previously-  
95 validated humanized yeast model system(22). In this system, the *Homo sapiens GDII* (*HsGDII*)  
96 can complement a temperature sensitive allele of the orthologous *Saccharomyces cerevisiae* gene  
97 *Gdi1* (*ScGdi1* (Ts)) and thereby restore yeast growth at restrictive temperatures. Importantly,  
98 pathogenic variants of *HsGDII* (L92P and R423P) showed a reduced ability to complement  
99 *ScGdi1*(Ts) (22). This supported the possibility of a yeast-based functional assay of *HsGDII*  
100 variants, which we scaled up in order to test large numbers of missense variants in parallel (fig.  
101 1a).

102 Mutagenesis of the *HsGDII* open reading frame (ORF) was performed using a  
103 previously-described pooled mutagenesis approach, Precision Oligo-Pool based Code Alteration  
104 or "POPCode" (8), which uses oligonucleotide-directed codon randomization to yield a library of  
105 single-codon *GDII* variants. Following mutagenesis, the variant library was cloned into yeast  
106 expression vectors and transformed *en masse* into a *S. cerevisiae* strain carrying the temperature  
107 sensitive *ScGdi1*(Ts) allele. The yeast library was then grown competitively at restrictive  
108 temperatures to induce selection for cells containing functional *HsGDII* variants.

109 The library of *HsGDII* ORFs was extracted from both pre- and post-selection yeast  
110 populations, and sequenced deeply (with each position being observed in ~2 million reads). The  
111 deep sequencing approach used was TileSeq (8), involving amplification and paired-end  
112 sequencing of 12 "tiles", each ~100 nucleotides in length, that together cover the length of the  
113 *GDII* ORF. In order to decrease the rate of variants called erroneously due to sequencing error,  
114 only variants that were detected in both forward and reverse reads were accepted. In total, 5534  
115 unique amino acid changes were detected. To understand the rate at which missense variants are

116 detected due to PCR or sequencing errors, we also sequenced a ‘mock library’ derived from a  
117 wild-type clone. These data were used to filter out variants that were not represented at high  
118 enough frequencies in the pre- or post- selective pools to rule out the possibility that they were  
119 detected due to PCR and sequencing error alone (see materials and methods). Even after this  
120 filter, variants that were present at lower frequencies in the pre-selection library showed poorer  
121 agreement between replicates (fig. S1) and poorer correlation with PROVEAN (23) scores (fig.  
122 S2b). We therefore identified a set of high confidence variants by further removing variants that  
123 had been detected at a frequency lower than  $2 \times 10^{-4}$  in the original library. After filtering, 1730  
124 high confidence variants remained, covering 1154 unique amino acid changes (19% of all  
125 possible amino acid substitutions and 45% of possible amino acid substitutions accessible  
126 through alteration of a single nucleotide (fig. 1b).

127 For each variant, the ratio ( $\phi$ ) of frequency in post- to pre-selective pools was used to  
128 infer variant functionality. Indeed, we saw a distinct separation between  $\log(\phi)$  values for  
129 synonymous variants, which would generally be expected to fully complement the *ScGdi1*(Ts)  
130 allele, and  $\log(\phi)$  values for stop codon variants, which would generally be expected to  
131 completely fail to complement (fig. 1c). Most missense variants appeared wild-type-like in their  
132 ability to complement, some were null-like, and many had intermediate effects (fig. 1c).

133

### 134 **A variant effect map for *GDI1***

135 Log( $\phi$ ) values were rescaled to define a "fitness score" for each variant, representing the  
136 ability of that variant to complement the *ScGdi1*(Ts) allele (see materials and methods). With the  
137 goal that a fitness score of 1 represents a fully-functional protein and a fitness score of 0  
138 represents complete loss of function, we rescaled log-ratios such that the median log ratio of

139 synonymous variants was 1 and the median log ratio of variants containing a premature stop  
140 codon was 0 (medians shown in fig. 1c). When calculating median log ratios, we included only  
141 high confidence measurements ( $SD < 0.3$ ) and, because nonsense mutations near the C-terminus  
142 result in less severe loss of complementation, we only considered nonsense mutations within the  
143 first 400 amino acids of the *GDI1* ORF (fig. S3). In order to estimate fitness scores for the  
144 remaining 80% of amino acid changes and refine scores of variants that were less well measured,  
145 we applied a previously-described imputation pipeline (24). This pipeline uses the Gradient  
146 Boosted Tree method to impute missing values based on intrinsic features of the data set  
147 including average fitness of nearby variants, amino acid substitution matrix scores  
148 (BLOSUM100 (25)), and variant effect scores predicted by computational methods including  
149 PolyPhen-2 (26), and PROVEAN (23). To avoid low-confidence predictions based on limited  
150 experimental data, imputation was not performed for amino acid positions with fewer than 3  
151 well-measured variants. The result was a ‘variant effect map’ encompassing the majority of all  
152 possible amino acid substitutions in *GDI1* (fig. 2). The most important features for predicting  
153 fitness scores in this data set were the average fitness scores of the three most similar variants at  
154 the same amino acid position, followed by BLOSUM100, PolyPhen2, and PROVEAN scores  
155 (fig. S4).

156

### 157 **Our variant effect map is consistent with known biochemical features of GDI1**

158 The GDI1 protein contains four sequence conserved regions (SCRs), SCR1, SCR2,  
159 SCR3A and SCR3B, common to all members of the Rab-GDI/CHM superfamily (27). Together,  
160 SCR1 and SCR3B form a Rab-binding platform at the apex of the GDI1 structure (27,28) (fig.  
161 3a). SCR3A contains a mobile effector loop (MEL) which constitutes a membrane receptor

162 binding site as well as a helix flanking the lipid binding pocket (29,30). At its N-terminal end,  
163 SCR2 contains the C-terminus-binding region (CBR), which forms an essential interaction with  
164 the C-terminus of Rab (28).

165 To determine overall patterns of variant deleteriousness within GDI1, we took the  
166 average fitness score of all variants at a given amino acid position resulting in a "positional  
167 fitness score" (fig. 3b). As expected, average fitness was significantly lower in the sequence-  
168 conserved regions than in other parts of the protein (fig. 3c, 3d), supporting the notion that these  
169 regions are important for biological function. We modeled the sequence of *H. sapiens* GDI1 on  
170 the crystal structure of *S. cerevisiae* RabGDP-dissociation inhibitor in complex with prenylated  
171 YPT1 GTPase (28) (the yeast homolog of human Rab-1A). The conserved face of GDI1  
172 constituting the Rab binding platform contains the majority of residues with low positional  
173 fitness scores (fig. 3a). Mutations in the SCR1 and SCR3B segments exhibited the lowest  
174 positional fitness on average (fig 3d), consistent with previous mutational analysis showing that  
175 disrupting these regions leads to decreased Rab binding and inability of GDI1 to extract Rab  
176 from membranes (27). Since the C-terminal non-conserved region showed a striking increase in  
177 average fitness scores around residue 425 (fig. 3b), we divided this region into two separate  
178 sections, "linker 3", consisting of residues 460-424, and "C-terminus", consisting of residues  
179 425-447. Mutations in the 22 "C-terminus" residues were significantly less deleterious than those  
180 in linker 3 (Wilcoxon  $p < 0.01$ ). The non-conserved region between SCR1 and SCR2 (termed  
181 "linker 1") also exhibited high fitness scores, suggesting that variation here is also well tolerated  
182 (fig. 3d).

183 Compared to SCR1 and SCR3B, variants in SCR2 were significantly less deleterious  
184 (Wilcoxon  $p < 0.01$ , and  $p < 0.001$  respectively). On average, fitness scores of variants in SCR2



185 were comparable to those in the non-conserved region between SCR2 and SCR3A (termed  
186 "linker 2") and the non-conserved linker 3 region (fig. 3d). Within SCR2, variants with the most  
187 severe fitness effects tend towards the N-terminal CBR segment (fig. 3b). However, altering any  
188 one of several hydrophobic residues within the helices flanking the lipid binding pocket,  
189 especially Leu216 and Leu144, also yielded low positional fitness (fig. 3e). The location of these  
190 residues, coupled with their average positional fitness scores, suggests that they may play an  
191 important role in geranylgeranyl binding.

192 Deleterious mutations within the SCR3A region were observed predominantly towards  
193 the C-terminus. Residues within the MEL region had moderate average positional fitness scores  
194 between 0.5 to 0.75. It was previously reported that when MEL mutations Arg218Ala,  
195 Tyr219Ala, and Ser222Ala are introduced into the corresponding positions of the yeast protein  
196 ScGdi1, they do not cause visible growth defects in yeast. However, when any one of these is  
197 introduced in combination, they can exacerbate the effects of partial loss-of-function variants  
198 elsewhere in *GDII* (29). Our results show that single mutants Arg218Ala, Tyr219Ala, and  
199 Ser222Ala each result in modest loss of function with fitness scores of 0.75 +/- 0.18, 0.67 +/-  
200 0.22, and 0.66 +/- 0.13 respectively (regularized standard error for fitness scores was calculated  
201 as described in materials and methods). It is possible that our competition-based assay was more  
202 sensitive to minor growth changes and thus able to detect growth defects not detected by spotting  
203 assays. While the study by Luan et al. only tested mutations in residues 218 - 222, we observed  
204 some variants just outside of this region to be extremely deleterious, especially a short  $\beta$  strand  
205 (termed  $\beta$ -strand e3 in Luan *et al.*) from residues Ser222 to Pro227 (fig. 3e). Despite the  
206 importance of this segment indicated by our map, a biological function for this strand segment  
207 has not been described.

208

## 209 **Relating fitness score to severity of intellectual disability**

210           Severity of ID is highly variable with cases ranging from mild to profound (31).

211   Although the severity of ID has been reported for only three *GDII* missense variants have been  
212   reported to date, we explored whether there was potential for variant fitness scores to predict the  
213   severity of the associated ID phenotype. Males from a family with the Leu92Pro variant, were  
214   reported to suffer from mild to moderate ID (11,32). For this variant, we obtained a fitness score  
215   of 0.74 +/- 0.03. Individuals in a family carrying the Gly237Val variant were reported to have  
216   moderate ID (33), and we observed a corresponding lower fitness score of 0.55 +/- 0.07 for  
217   Gly237Val. Thus, the order of the fitness scores for these two variants agreed with the reported  
218   order of ID severity. We note however that, like 20 (80%) of the 25 variants listed in the ClinVar  
219   database, both Leu92Pro and Gly237Val are currently annotated as a variants of uncertain  
220   significance, highlighting the need for better tools for interpretation. Finally, a family carrying  
221   the Arg423Pro variant suffered moderate to severe ID (15). We did not observe Arg423Pro in  
222   our assay, and were only able to impute a score with necessarily higher estimated uncertainty  
223   (0.64 +/- 0.24). Although fitness scores may be predictive of ID severity; it is currently  
224   insufficient to draw this conclusion from only reported ID severity data.

225

## 226 ***GDII* variant effect map predicts pathogenic variants with higher precision than** 227 **computational methods alone**

228           In order to test whether fitness scores from the *GDII* map can provide useful evidence for  
229   determining variant pathogenicity, we wished to determine whether our variant effect map can be  
230   used to separate known benign from damaging alleles. Our set of presumed-damaging variants

231 included the only variant currently annotated as pathogenic (Arg423Pro (15)) and the additional  
232 missense *GDI1* variants discussed above: Leu92Pro (11,32) and Gly237Val (33) based on  
233 evidence from clinical reports. Because the number of currently known human pathogenic variants  
234 is small, we also included four missense variants in highly-conserved regions which have been  
235 previously shown to inhibit the ability of GDI1 to extract Rab3A from membranes in rat  
236 synaptosomes, Tyr39Val, Glu233Ser, Met250Tyr, and Thr248Pro (27). To establish a reference  
237 set of presumed-tolerated variants, we extracted all variants in gnomAD that had been observed in  
238 male subjects (who are hemizygous for *GDI1* and less likely to be ID given that gnomAD excludes  
239 subjects with early-childhood disease). Although we cannot rule out the possibility that our set of  
240 presumed-damaging variants contains some tolerated variants, nor that our set of tolerated variants  
241 contains some damaging variants, we reasoned these sets would enable a conservative estimate of  
242 the ability of our scores to distinguish damaging from tolerated variation.

243 We observed that our sets of presumed tolerated and damaging alleles were well-separated  
244 based on fitness score (fig 4a). Although fitness scores for presumed-damaging variants showed a  
245 strong tendency to have lower scores, the lowest score amongst these was 0.5 and none were null-  
246 like. We next calculated a precision-recall curve (fig. 4b) showing, as we change the fitness score  
247 threshold below which a variant is deemed “damaging,” the trade-off between precision (fraction  
248 of below-threshold variants that are damaging) and recall (fraction of damaging variants that are  
249 below the threshold). For comparison we also provide precision-recall curves for commonly used  
250 computational predictors of variant effect including PolyPhen-2 (34), PROVEAN (23), and  
251 VARITY (35) (fig. 4b). Our variant effect mapping framework was able to identify 6 out of 7  
252 damaging variants (87% recall) with 100% precision using a fitness score threshold of <0.68. We  
253 identified all damaging variants (100% recall) with 88% precision when a threshold fitness score

254 of <0.74 was used. The most accurate computational predictors were VARITY and PolyPhen-2,  
255 which were each able to identify ~75% of damaging variants with ~75% precision.

256       Because single computational predictors are rarely used in isolation, we wondered  
257 whether a combined computational prediction score, encompassing data from PolyPhen-2,  
258 PROVEAN, and VARITY could separate damaging and tolerated variants with accuracy similar  
259 to our variant effect mapping framework. We rationalized that agreement between multiple  
260 computational prediction methods might be interpreted as stronger evidence for variant effect  
261 than a single computational method alone. We therefore scaled the PolyPhen-2, PROVEAN, and  
262 VARITY scores, and our fitness scores for the tolerated and damaging variant sets described  
263 above such that scores ranged from 0 to 1 (with 0 representing most damaging and 1 representing  
264 most tolerated). This allowed us to make comparisons between the different score types (fig.  
265 4c). Notably, all the prediction methods were able to accurately identify all of the damaging  
266 variants (fig 4c). (Note that VARITY only generates predictions for single nucleotide variants, so  
267 scores were not generated for 3 out of 7 damaging variants). However, it can be seen that the  
268 increased accuracy of our VE mapping framework is due to the lack of false positives (prediction  
269 of a damaging variant/low fitness score when the variant is in fact tolerated). Moreover, the three  
270 computational methods tended to agree on many of the false positives, each assigning them low  
271 scores when the variant was in fact tolerated. For instance, Gly114Cys, Arg141Leu, Arg218Gln,  
272 and Arg292Trp were four particularly prominent false positives where each of the computational  
273 methods predicted a low score, however, the fitness score generated by our VE mapping  
274 framework correctly indicated that the variant was tolerated. Thus, we conclude that agreement  
275 between computational predictors does not necessarily appear to be an indicator of accuracy. To  
276 further illustrate this, wished to generate a “combined computational predictor score” which

277 takes into account the agreement between different computational predictors. We therefore took  
278 the median of the scaled scores from the three computational prediction tools, reasoning that this  
279 would eliminate outliers where an individual prediction tool did not agree with the other two.  
280 When we plotted the precision recall curve for this “combined computational predictor” we  
281 found that it did not perform better than the individual predictors (fig. 4d). This is consistent with  
282 our notion that the shortcomings of the computational prediction methods are not due to  
283 individual outlying predictions.

284

### 285 **Using our VE map to interpret clinically-relevant missense variants**

286 To facilitate the use of fitness scores as evidence to classify variants, we wished to  
287 calculate likelihood ratios that convey the extent to which one should raise or lower the  
288 probability that a variant is damaging, based on the fitness score. To this end, we estimated  
289 probability density functions that describe the distributions of scores from our presumed-  
290 damaging and -tolerated variant sets (see Methods). Then, the ratios of probability density for  
291 damaging and tolerated variants can be used to obtain a damaging:tolerated likelihood ratio for  
292 variants with any given fitness score. By this method, we determined that variants with fitness  
293 scores below 0.72 were over 10 times more likely to be damaging than tolerated and variants  
294 with fitness scores above 0.81 were over 10 times more likely to be tolerated than damaging.

295 We wondered whether our map could aid in the interpretation of GDI1 variants of  
296 unknown significance which have been observed in the clinic (fig. 5). The ClinVar database lists  
297 25 missense variants in GDI1, only four of which currently has a definitive clinical  
298 interpretation. For 15 out of the 21 variants without a definitive interpretation, we were able to  
299 generate an interpretation of either “deleterious” or “tolerated” with odds ratios greater than 1:10

300 based on our VE map (fig. 5). In order to be conservative with our interpretations, any variants  
301 which had intermediate fitness scores leading to odds ratios less than 1:10 were labeled as  
302 “unknown”. Of note, we discovered four additional variants (in addition to those previously  
303 included in our “likely damaging” variant set) that, were found by our assay to be highly  
304 deleterious: R35W, G40V, R290S, and V381E. The latter three of these variants had almost null-  
305 like scores. This highlights the possibility that ID due to *GDII* mutations is under-diagnosed due  
306 to current limitations in clinical variant interpretation.

307         Interestingly, Phe158Ser, annotated on ClinVar as "likely pathogenic" based on the  
308 amino acid change being located within in a conserved region (SCR2), was non-conservative  
309 with respect to amino acid properties, and was not observed as a common variant in the NHLBI  
310 Exome Sequencing Project (37). However, our map score for Phe158Ser ([0.875 +/- 0.03]  
311 originally, [0.870 +/- 0.03] post-refinement) does not provide strong evidence that this variant is  
312 damaging. Using our current model based on the distributions of known pathogenic and benign  
313 variants, and using no prior assumptions about the pathogenicity of Phe158Ser, a fitness score of  
314 0.87 indicates the odds that the variant is damaging is less than 1:100. If our likelihood ratio  
315 calibration is accurate, then even given a very strong prior belief ( $P = 0.99$ ) that this variant is  
316 damaging, the posterior odds would be less than 1:10.

317

318

## 319 **Discussion**

320         Towards clinical variant interpretation, the likelihood ratios that we derived for each  
321 variant from our map could be discretized as strong, moderate, or supporting evidence for the  
322 functional impact of a variant, and combined with other evidence using American College of

323 Medical Genetics and Genomics/Association for Molecular Pathology (ACMG/AMP) guidelines  
324 (5). Alternatively, a Bayesian framework consistent with ACMG/AMP guidelines has been  
325 proposed (36), in which the likelihood ratios we provide could be used directly and  
326 quantitatively to infer variant pathogenicity (in the context of other evidence such as family  
327 history, co-segregation, etc.).

328         A major drawback of our likelihood estimation approach is the limited number of known  
329 damaging and tolerated variants currently available. Due to small sample sizes, our current  
330 estimate of the score distributions of known damaging and tolerated variants is only an  
331 approximation. As more variants in *GDI1* are discovered, assigned clinical significance and  
332 added to databases such as ClinVar, this information should be incorporated to more confidently  
333 estimate likelihood ratios.

334         In addition to variant interpretation, variant effect maps can also provide insights into the  
335 function of a protein's structural components. In previous studies, structure-function analysis of  
336 *GDI1* has been largely focused on the conserved regions common to all members of the  
337 *GDI/CHM* superfamily. Our results confirm that variants within the conserved regions forming  
338 the Rab binding platform do tend to be the most deleterious. However, certain residues within  
339 non-conserved regions exhibited fitness scores that suggested damaging substitutions. These  
340 positions may be important for protein folding or stability, or contribute to functional roles of  
341 *GDI1* not shared by other members of the GDI family. While the MEL region has been the focus  
342 for mutational analysis within SCR3A, we found that variants flanking the MEL region,  
343 especially within  $\beta$ -strand e3, appeared markedly more deleterious. These findings can be used  
344 to guide further mutational analysis of *GDI1*, aimed at discovering the specific functional roles  
345 of each of these regions.

346           Due to the length of the *GDII* ORF, the coverage of well-measured amino acid  
347 substitutions for *GDII* (19%) was somewhat lower than had been achieved for previous genes  
348 studied using this approach (8,9). Nonetheless, precision-recall analysis revealed that, after  
349 imputation by machine learning, the variant effect map was able to predict pathogenic variants  
350 with greater accuracy than current computational methods alone, and with precision similar to  
351 previously studied genes. Thus, using experimental data for a minority of substitutions, we could  
352 accurately score variant effects for the majority of amino acid changes.

353           As genetic testing and exome sequencing continue to be used as diagnostic tools for  
354 genetic disorders, it is expected that more patients with novel *GDII* mutations will be  
355 discovered. This map can be used to assist the interpretation of variants immediately upon their  
356 discovery, thus accelerating the diagnostic process which is often costly, time-consuming, and  
357 stressful for patients and their families. Due to the highly heterogeneous etiology of ID, it is  
358 reasonable to expect that response to therapeutic and pharmacological interventions may also  
359 vary in accordance with the cause of ID. Unfortunately, therapeutic guidelines rarely  
360 differentiate between different forms of ID. Increased rates of etiological diagnoses could  
361 improve our understanding of rare forms of ID and aid in the development of more personalized  
362 guidelines for management and treatment.

363

## 364 **Conclusions**

365 Here we have presented the first variant effect map for single amino acid substitutions in *GDII*,  
366 and showed that map scores could distinguish presumed-damaging from presumed-tolerated  
367 variants with better precision than current computational approaches (including Polyphen2,  
368 VARIETY, and PROVEAN) at all recall thresholds. Furthermore, our variant effect map recovers



369 known biochemical and structural features of GDI1 and provides insights into structural regions  
370 which may be important for GDI1 function.

371

372

373

## 374 **Methods**

375

### 376 **Strains and Plasmids**

377 The *S. cerevisiae* strain carrying the temperature sensitive Gdi1 allele, TSA64 (*gdi1-1::KanR*;  
378 *his3Δ1 leu2Δ0 ura3Δ0 met15Δ0*) (gift from G. Tan, C. Boone and B. Andrews) was used as a  
379 host for the *GDII* variant library. The Gateway destination vector used to express Hs*GDII*,  
380 pHYC-NatMX (CEN/ARS-based, ADH1 promoter, and NatMX marker), was constructed  
381 previously (22). The Hs*GDII* ORF clone (pDONR223-*GDII*) was obtained from the Human  
382 ORFeome v8.1 library (38).

383

### 384 **Construction of *GDII* variant library by POPcode mutagenesis**

385 POPcode mutagenesis was performed on the *GDII* ORF as described previously (9):  
386 Oligonucleotides of 28-38 bases were designed to target each codon in the open reading frame of  
387 *GDII*, such that the targeted codon is replaced with a NNK-degenerate codon (a mixture of all  
388 four nucleotides in the 1st and 2nd codon positions, and a mixture of G and T in the 3rd  
389 position). Oligos were annealed to uracilated *GDII* template, gaps between annealed  
390 oligonucleotides were filled using KAPA HiFi Uracil+ DNA polymerase, nicks were sealed  
391 using T4 DNA ligase, and the wild type template was degraded using Uracil-DNA-Glycosylase.

392 The variant library was transferred to the yeast expression vector, pHYC-NatMX, by *en masse*  
393 Gateway LR reaction (8) followed by transformation into NEB5a competent E. coli cells (New  
394 England Biolabs) and selection for ampicillin resistance. Plasmids extracted from a pool of  
395 ~100,000 clones were transformed into the *S. cerevisiae* temperature-sensitive strain TSA64 *en*  
396 *masse* using EZ Kit Yeast Transformation kit (Zymo Research). The entire transformed library  
397 was grown in selective media (YPD + clonNAT) for two overnights. All yeast growth was  
398 carried out at permissive temperature (25C).

399

#### 400 **High-throughput yeast-based complementation**

401 For the pre-selection condition, plasmids were extracted from two 9 ODU samples of yeast  
402 culture carrying the variant library (to be used for downstream tiling PCR). For the selective  
403 condition, two replicates of 20 ODU of cells were inoculated into 200ml of YPD + clonNAT and  
404 grown to full density at restrictive temperature (38°C) with shaking. Plasmids for tiling PCR  
405 were extracted from 9 ODU of each culture following competitive growth. In parallel, 2 ODU of  
406 TSA64 expressing wild type *GDII* was inoculated into 20ml of YPD + clonNAT. Wild type  
407 pools were grown under the same conditions as the POPcode library and plasmid was extracted  
408 from 9 ODU samples to be used as a control for sequencing error during TileSeq.

409

#### 410 **Measurement of allele frequencies in pre- and post-selective pools by TileSeq**

411 TileSeq was performed on the plasmids extracted from pre-selective, post-selective, and wild  
412 type pools as described previously (8): (i) The *GDII* ORF was amplified with primers carrying a  
413 binding site for Illumina sequencing adaptors; (ii) each amplicon was indexed with an Illumina  
414 sequencing adaptor; (iii) paired end sequencing was performed on the tiled amplicons to an

415 average sequencing depth of ~ 2 million reads. Raw sequencing reads were mapped to the *GDI1*  
416 ORF using Bowtie2 (39). A custom Perl script (40) was used to parse the alignment files to count  
417 the number of co-occurrences of a codon change in both paired reads. Mutational counts for each  
418 tiled region were subsequently normalized by the corresponding sequencing depth, generating a  
419 "raw data" file (table S1) where mutational counts are expressed in “reads per million”, i.e. the  
420 number of reads normalized to a depth of 1M reads (indicated as “reads/million” below).

421

## 422 **Data processing and fitness score calculation**

423 Processing of raw read count data (available in table S1) was carried out using the “legacy2.R”  
424 script (41). This script is derived from the “legacy.R” script from the tileseqMave R package  
425 described previously (10), with several modifications to improve filtering and fitness score  
426 calculation for variants detected at low frequencies. Read counts for each variant in the wild type  
427 control were subtracted from the corresponding read count for variants in each condition in order  
428 to account for the detection of variants due to sequencing error. An enrichment ratio ( $\phi$ ) was  
429 calculated for each variant as the ratio of the normalized read counts after selection to before  
430 selection. Since there was less agreement between replicate read counts for variants present at  
431 lower frequencies in the pre-selection pool, a pre-filter was applied to remove all variants present  
432 in fewer than 200 reads/million in either replicate. The cut-off value of 200 reads/million was  
433 chosen in order to maximize the *t*-statistic measure of separation of mean synonymous and  
434 pathogenic log ratios (fig. S2a). Additionally, any variants with read counts within 3 standard  
435 deviations of zero in the post-selective condition were removed from the data set due to the  
436 possibility that they were lost due to a bottleneck effect when sampled from the pre-selective  
437 pool. As described previously (8), standard deviation estimates were regularized according to a

438 method for Bayesian regularization described by Baldi and Long (42), which improves  
439 confidence estimates for measurements for which few replicates are available (in this case, two).  
440 A fitness score ( $FS_{MUT}$ ) was calculated for each variant as  $\ln(\phi_{MUT}/\phi_{STOP})/\ln(\phi_{SYN}/\phi_{STOP})$ , where  
441  $\phi_{MUT}$  is the enrichment ratio calculated for each variant,  $\phi_{STOP}$  is the median enrichment ratio of  
442 all well-measured nonsense variants and  $\phi_{SYN}$  is the median enrichment ratio of all well-  
443 measured synonymous variants, such that  $FS_{MUT}$  equals zero when  $\phi_{MUT}$  equals  $\phi_{STOP}$  and  $FS_{MUT}$   
444 equals one when  $\phi_{MUT}$  equals  $\phi_{SYN}$ . Well-measured variants included in the calculation of the  
445 medians  $\phi_{STOP}$  and  $\phi_{SYN}$  were those for which enrichment ratios between replicates agreed highly  
446 with regularized standard deviation less than 0.3. Because nonsense mutations after residue 400  
447 did not result in complete loss of function (fig. S3), nonsense mutations at amino acid positions  
448 greater than 400 were excluded from the  $\phi_{STOP}$  calculation. Fitness scores generated through this  
449 pipeline are available in table S2.

450

#### 451 **Imputation for missing variant effect map positions and fitness score refinement**

452 Imputation was performed using the variant effect imputation web server (24). The imputation  
453 machine learning model was trained on the fitness scores of the experimentally measured  
454 variants using the Gradient Boosted Tree (GBT) method. Features of the measured variants used  
455 in the model include mean fitness scores of up to three nearest neighbor variants, standard fitness  
456 score error of up to three most similar neighbor variants at the same position, number of  
457 neighbors used, PolyPhen-2 score, PROVEAN score, and Blosum100 score. Fitness scores for  
458 missing variants were not imputed for positions with fewer than three well-measured variants  
459 due to insufficient functional data. Fitness scores of experimentally measured variants were also  
460 refined using the weighted average of imputed and measured values (weighting by the inverse-

461 square of estimated standard error in each input value). Output of the imputation pipeline is  
462 available in table S3.

463

#### 464 **Construction of GDI1 homology model**

465 Human GDI1 (RefSeq: NP\_001484.1) residues 1 - 426 were modeled on the crystal structure of  
466 RabGDP-dissociation inhibitor in complex with prenylated YPT1 GTPase (PDB: 1UKV) using  
467 Swiss-Model ProMod3 Version 1.3.0 (43). The poorly-aligned 21 C-terminal residues were not  
468 included in the model.

469

#### 470 **Likelihood ratio calculations**

471 Our set of presumed damaging human variants contained Leu92Pro (11), Arg423Pro (15), and  
472 Gly237Val (33). Arg423pro is currently annotated as “pathogenic” on ClinVar. Leu92Pro was  
473 previously annotated as pathogenic but is currently annotated as having “uncertain significance”,  
474 however we believe that d’Adamo et. al (11) provide strong evidence for the deleteriousness of  
475 this mutation. Gly237Val was added to ClinVar more recently and is also annotated as having  
476 “uncertain significance”, however this variant seemed likely to be deleterious based on familial  
477 segregation analysis by Duan et. al (33). We included four additional variants, Tyr39Val,  
478 Glu233Ser, Met250Tyr, and Thr248Pro (27), which have not been observed in humans, but  
479 which were shown to inhibit GDI1 function in functional assays. The set of presumed tolerated  
480 variants consisted of the 46 gnomAD variants from male subjects (hemizygous at the *GDI1*  
481 locus), who were presumed to be healthy given that gnomAD excludes subjects with early  
482 childhood disease. Normal distributions were fitted to the histograms of the fitness scores of  
483 presumed damaging and tolerated variants by maximum likelihood parameter estimation in order

484 to obtain estimated probability density functions for pathogenic/disease and benign variants ( $p_D$   
485 and  $p_B$  respectively). The normal distributions used are shown in fig. 4a (but scaled such that the  
486 area under each curve equals 1 for likelihood ratio calculations). The damaging:tolerated  
487 likelihood ratio for a variant with fitness score,  $f$ , was calculated as the ratio of the estimated  
488 probability density functions evaluated at  $f$ :  $\Lambda(D:T | f) = p_D(f)/p_T(f)$ . This likelihood ratio  
489 can be used together with prior beliefs about a variants' pathogenicity to calculate the odds that a  
490 variant is damaging,  $O(D:T | f)$ , using the Odds form of Bayes' rule:

$$491 \quad O(D:T | f) = \Lambda(D:T | f) \times \frac{P(D)}{P(T)}$$

492 where,  $\Lambda(D:T | f)$  is the likelihood ratio,  $P(D)$  is the prior probability that the variant is  
493 damaging, and  $P(T)$  is the prior probability that the variant is tolerated such that  $P(T) = 1 -$   
494  $P(D)$ .

495

496

#### 497 **Declarations**

#### 498 **Ethics approval and consent to participate**

499 Not applicable

#### 500 **Consent for publication**

501 Not applicable

#### 502 **Availability of data and materials**

503 All data generated or analyzed during this study are included in this published article and its  
504 supplementary information files.

#### 505 **Competing interests**

506 F.P.R. is a scientific advisor and shareholder for SeqWell, Constantiam Biosciences and  
507 BioSymetrics, and a Ranomics shareholder. S.S. is an employee of Sanofi Pasteur and a  
508 Ranomics shareholder. M.V. is an employee and shareholder of Deep Genomics, Inc. The  
509 authors declare no other competing interests.

#### 510 **Funding**

511 We gratefully acknowledge support from the National Human Genome Research Institute of the  
512 National Institutes of Health National Human Genome Research Institute (NIH/NHGRI) Center  
513 of Excellence in Genomic Science Initiative (HG010461), by the NIH/NHGRI Impact of  
514 Genomic Variation on Function (IGVF) Initiative (UM1HG011989), the Canada Excellence  
515 Research Chairs Program, a Canadian Institutes of Health Research Foundation Grant to F.R.,  
516 and a Natural Sciences and Engineering Research Council of Canada Undergraduate Student  
517 Research Award to R.S..

#### 518 **Authors' contributions**

519 SS and FPR conceived the project. SS established the assay. MV, SS, IF, and JK performed  
520 mutagenesis and selection. MG performed sequencing. RAS performed primary data analyses  
521 with contributions from SS and JW. RAS performed all downstream analyses of map scores,  
522 including analysis of sequence-structure-function relationships. YW developed the machine  
523 learning imputation pipeline with contributions from JW. RAS and FPR wrote the manuscript.  
524 All authors read and approved the manuscript.

#### 525 **Acknowledgments**

526 We thank Guihong Tan, Charles Boone and Brenda Andrews for generously providing the  
527 TSA64 *S. cerevisiae* strain.

528

529 **References**

- 530 1. Karczewski KJ, Francioli LC, Tiao G, Cummings BB, Alföldi J, Wang Q, et al. The  
531 mutational constraint spectrum quantified from variation in 141,456 humans. *Nature*.  
532 2020;
- 533 2. Starita LM, Ahituv N, Dunham MJ, Kitzman JO, Roth FP, Seelig G, et al. Variant  
534 Interpretation: Functional Assays to the Rescue. *American Journal of Human Genetics*.  
535 2017.
- 536 3. Landrum MJ, Lee JM, Benson M, Brown G, Chao C, Chitipiralla S, et al. ClinVar: Public  
537 archive of interpretations of clinically relevant variants. *Nucleic Acids Res*. 2016;
- 538 4. Wright CF, West B, Tuke M, Jones SE, Patel K, Laver TW, et al. Assessing the  
539 Pathogenicity, Penetrance, and Expressivity of Putative Disease-Causing Variants in a  
540 Population Setting. *Am J Hum Genet*. 2019;
- 541 5. Richards S, Aziz N, Bale S, Bick D, Das S, Gastier-Foster J, et al. Standards and  
542 guidelines for the interpretation of sequence variants: A joint consensus recommendation  
543 of the American College of Medical Genetics and Genomics and the Association for  
544 Molecular Pathology. *Genet Med*. 2015;
- 545 6. Fowler DM, Araya CL, Fleishman SJ, Kellogg EH, Stephany JJ, Baker D, et al. High-  
546 resolution mapping of protein sequence-function relationships. *Nat Methods*. 2010;
- 547 7. Fowler DM, Fields S. Deep mutational scanning: A new style of protein science. *Nature*  
548 *Methods*. 2014.
- 549 8. Weile J, Sun S, Cote AG, Knapp J, Verby M, Mellor JC, et al. A framework for  
550 exhaustively mapping functional missense variants. *Mol Syst Biol*. 2017;
- 551 9. Sun S, Weile J, Verby M, Wu Y, Wang Y, Cote AG, et al. A proactive genotype-to-



- 552 patient-phenotype map for cystathionine beta-synthase. *Genome Med.* 2020;
- 553 10. Weile J, Kishore N, Sun S, Maaieh R, Verby M, Li R, et al. Shifting landscapes of human  
554 MTHFR missense-variant effects. *Am J Hum Genet.* 2021;
- 555 11. D’Adamo P, Menegon A, Nigro C Lo, Grasso M, Gulisano M, Tamanini F, et al.  
556 Mutations in GDI1 are responsible for X-linked non-specific mental retardation. *Nat*  
557 *Genet.* 1998;
- 558 12. D’Adamo P, Welzl H, Papadimitriou S, Di Barletta MR, Tiveron C, Tatangelo L, et al.  
559 Deletion of the mental retardation gene Gdi1 impairs associative memory and alters social  
560 behavior in mice. *Hum Mol Genet.* 2002;
- 561 13. Potokar M, Jorgačevski J, Lacovich V, Kreft M, Vardjan N, Bianchi V, et al. Impaired  
562  $\alpha$ GDI Function in the X-Linked Intellectual Disability: The Impact on Astroglia Vesicle  
563 Dynamics. *Mol Neurobiol.* 2017;
- 564 14. Goody RS, Rak A, Alexandrov K. The structural and mechanistic basis for recycling of  
565 Rab proteins between membrane compartments. *Cellular and Molecular Life Sciences.*  
566 2005.
- 567 15. Bienvenu T, Des Portes V, Saint Martin A, McDonnell N, Billuart P, Carrié A, et al. Non-  
568 specific X-linked semidominant mental retardation by mutations in a Rab GDP-  
569 dissociation inhibitor. *Hum Mol Genet.* 1998;
- 570 16. Strobl-Wildemann G, Kalscheuer VM, Hu H, Wrogemann K, Ropers HH, Tzschach A.  
571 Novel GDI1 mutation in a large family with nonsyndromic X-linked intellectual disability.  
572 *Am J Med Genet Part A.* 2011;
- 573 17. Stessman HAF, Xiong B, Coe BP, Wang T, Hoekzema K, Fenckova M, et al. Targeted  
574 sequencing identifies 91 neurodevelopmental-disorder risk genes with autism and

- 575 developmental-disability biases. *Nat Genet.* 2017;
- 576 18. Kvarnung M, Nordgren A. Intellectual disability & rare disorders: A diagnostic challenge.  
577 In: *Advances in Experimental Medicine and Biology.* 2017.
- 578 19. Bélanger SA, Caron J. Evaluation of the child with global developmental delay and  
579 intellectual disability. *Paediatr Child Heal.* 2018;
- 580 20. Monroe GR, Frederix GW, Savelberg SMC, De Vries TI, Duran KJ, Van Der Smagt JJ, et  
581 al. Effectiveness of whole-exome sequencing and costs of the traditional diagnostic  
582 trajectory in children with intellectual disability. *Genet Med.* 2016;
- 583 21. Thevenon J, Duffourd Y, Masurel-Paulet A, Lefebvre M, Feillet F, El Chehadeh-Djebbar  
584 S, et al. Diagnostic odyssey in severe neurodevelopmental disorders: Toward clinical  
585 whole-exome sequencing as a first-line diagnostic test. *Clin Genet.* 2016;
- 586 22. Sun S, Yang F, Tan G, Costanzo M, Oughtred R, Hirschman J, et al. An extended set of  
587 yeast-based functional assays accurately identifies human disease mutations. *Genome Res.*  
588 2016;
- 589 23. Choi Y, Chan AP. PROVEAN web server: A tool to predict the functional effect of amino  
590 acid substitutions and indels. *Bioinformatics.* 2015;
- 591 24. Wu Y, Weile J, Cote AG, Sun S, Knapp J, Verby M, et al. A web application and service  
592 for imputing and visualizing missense variant effect maps. *Bioinformatics.* 2019;
- 593 25. Henikoff S, Henikoff JG. Amino acid substitution matrices from protein blocks. *Proc Natl*  
594 *Acad Sci U S A.* 1992;
- 595 26. Adzhubei IA, Schmidt S, Peshkin L, Ramensky VE, Gerasimova A, Bork P, et al. A  
596 method and server for predicting damaging missense mutations. *Nature Methods.* 2010.
- 597 27. Schalk I, Zeng K, Wu SK, Stura EA, Matteson J, Huang M, et al. Structure and mutational

- 598 analysis of Rab GDP-dissociation inhibitor. *Nature*. 1996;
- 599 28. Rak A, Pylypenko O, Durek T, Watzke A, Kushnir S, Brunsveld L, et al. Structure of Rab  
600 GDP-Dissociation Inhibitor in Complex with Prenylated YPT1 GTPase. *Science* (80- ).  
601 2003;
- 602 29. Luan P, Heine A, Zeng K, Moyer B, Greasely SE, Kuhn P, et al. A new functional domain  
603 of guanine nucleotide dissociation inhibitor ( $\alpha$ -GDI) involved in Rab recycling.  
604 *Traffic*. 2000;
- 605 30. An Y, Shao Y, Alory C, Matteson J, Sakisaka T, Chen W, et al. Geranylgeranyl switching  
606 regulates GDI-Rab GTPase recycling. *Structure*. 2003;
- 607 31. Patel DR, Apple R, Kanungo S, Akkal A. Intellectual disability: Definitions, evaluation  
608 and principles of treatment. *Pediatric Medicine*. 2018.
- 609 32. Hamel BCJ, Kremer H, Wesby-van Swaay E, Van Den Helm B, Smits APT, Oostra BA,  
610 et al. A gene for nonspecific X-linked mental retardation (MRX41) is located in the distal  
611 segment of Xq28. *Am J Med Genet*. 1996;
- 612 33. Duan Y, Lin S, Xie L, Zheng K, Chen S, Song H, et al. Exome sequencing identifies a  
613 novel mutation of the GDI1 gene in a Chinese non-syndromic X-linked intellectual  
614 disability family. *Genet Mol Biol*. 2017;
- 615 34. Adzhubei I, Jordan DM, Sunyaev SR. Predicting functional effect of human missense  
616 mutations using PolyPhen-2. *Curr Protoc Hum Genet*. 2013;
- 617 35. Wu Y, Li R, Sun S, Weile J, Roth FP. Improved pathogenicity prediction for rare human  
618 missense variants. *Am J Hum Genet*. 2021;
- 619 36. Tavgigian S V., Greenblatt MS, Harrison SM, Nussbaum RL, Prabhu SA, Boucher KM, et  
620 al. Modeling the ACMG/AMP variant classification guidelines as a Bayesian

- 621 classification framework. *Genet Med.* 2018;
- 622 37. NHLBI GO Exome Sequencing Project (ESP). Exome Variant Server. NHLBI. 2018.
- 623 38. Yang X, Boehm JS, Yang X, Salehi-Ashtiani K, Hao T, Shen Y, et al. A public genome-  
624 scale lentiviral expression library of human ORFs. *Nat Methods.* 2011;
- 625 39. Langmead B, Salzberg SL. Fast gapped-read alignment with Bowtie 2. *Nat Methods.*  
626 2012;
- 627 40. TileSeq package [Internet]. Available from: [https://github.com/rothlab/tileseq\\_package](https://github.com/rothlab/tileseq_package)
- 628 41. Weile J, Silverstein R. Github/tileseqMave/legacy2.R [Internet]. Available from:  
629 <https://github.com/RachelSilverstein/tileseqMave/blob/master/R/legacy2.R>
- 630 42. Baldi P, Long AD. A Bayesian framework for the analysis of microarray expression data:  
631 Regularized t-test and statistical inferences of gene changes. *Bioinformatics.* 2001;
- 632 43. Studer G, Tauriello G, Bienert S, Biasini M, Johner N, Schwede T. ProMod3 - A versatile  
633 homology modelling toolbox. *PLoS Comput Biol.* 2021;
- 634 44. McGuffin LJ, Bryson K, Jones DT. The PSIPRED protein structure prediction server.  
635 *Bioinformatics.* 2000;

636

## 637 **Figures and Legends**

638

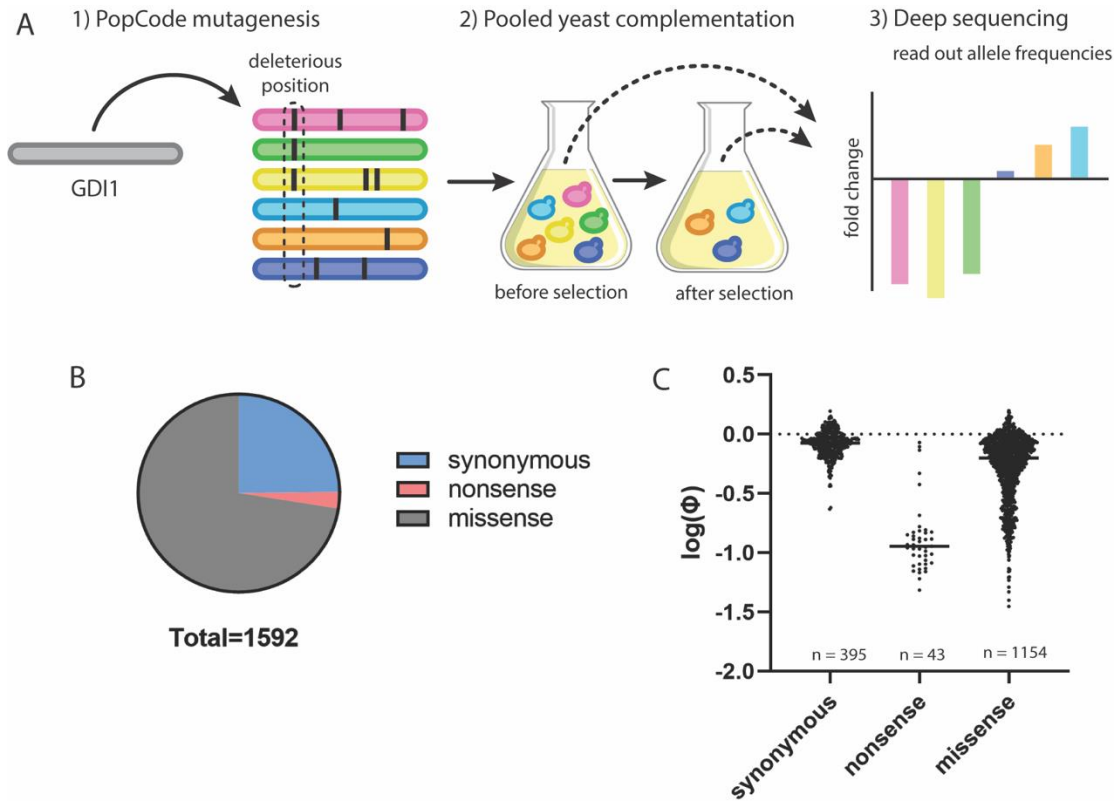

639

640 **Figure 1: High throughput yeast complementation screen separates synonymous and**  
641 **nonsense *GDI1* variants**

642 a) Graphical overview of the variant effect mapping framework.

643 b) Number of well-measured variants recovered from the complementation screen.

644 c) Log( $\phi$ ) values comparing pre- and post-selection variant frequencies for all well measured  
645 synonymous, nonsense and missense *GDI1* variants.

646

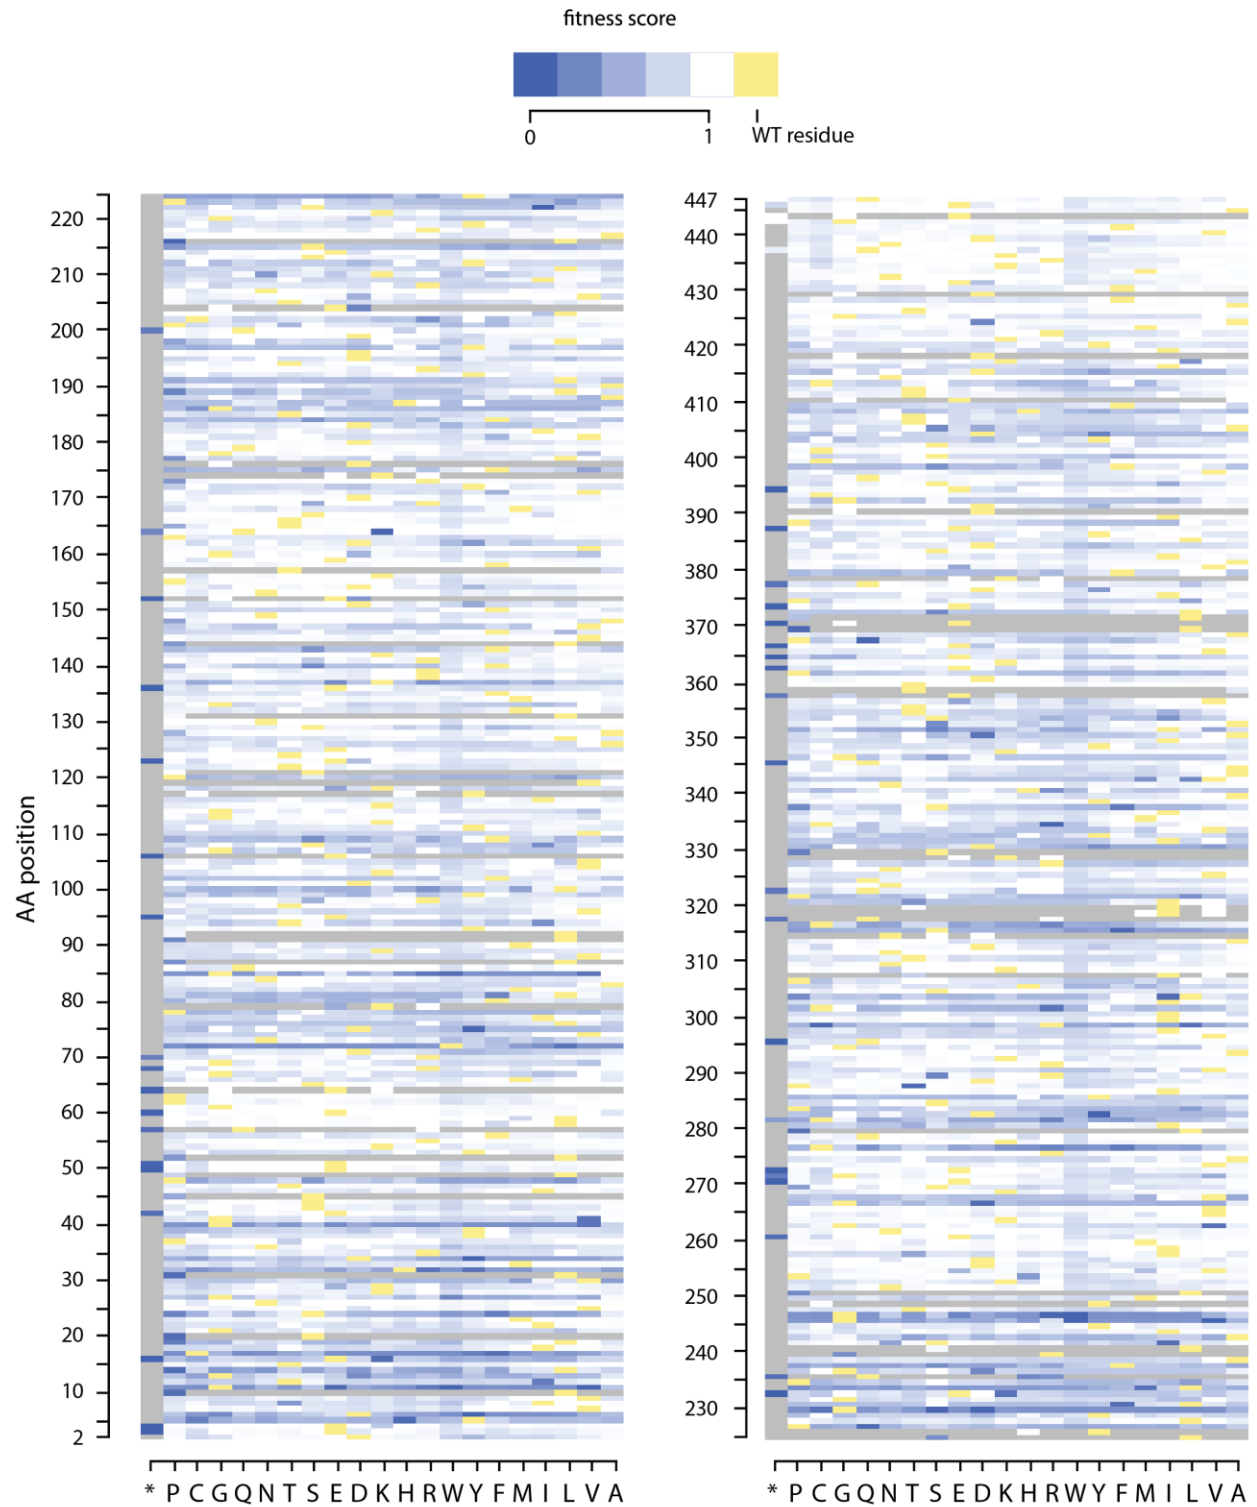

647

mutant residue

648 **Figure 2: *GDI1* variant effect map**

649 A *GDI1* missense variant effect map resulting from the complementation screen coupled with  
 650 imputation and refinement by machine learning. Fitness scores of 0 (blue) represent the median  
 651 behavior of complete loss of function variants (based on observed fitness of nonsense variants)  
 652 and fitness scores of 1 (white) represent wild type-like function (based on observed fitness of  
 653 synonymous variants). Yellow tiles represent the wild type amino acid at that position. Gray tiles  
 654 represent substitutions for which scores were not imputed due to insufficient data for  
 655 substitutions at that amino acid position.

656

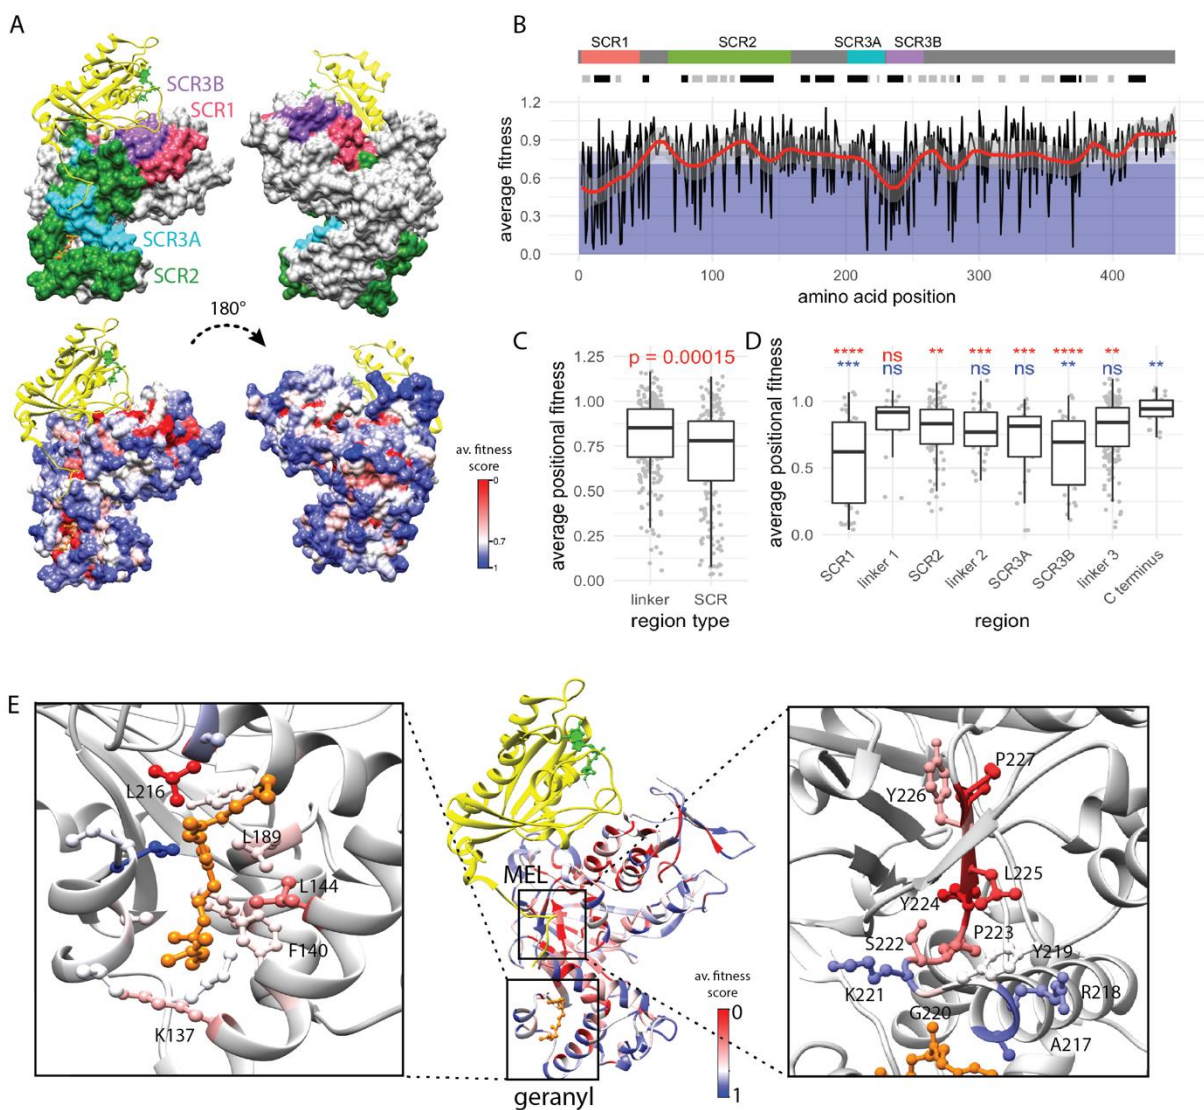

657



658 **Figure 3: Fitness scores enable structure-function analysis of *GDI1***

659 (a) Homology model of human *GDI1* (colored surface) modeled on the structure of *S. cerevisiae*  
660 RabGDP-dissociation inhibitor in complex with prenylated YPT1 GTPase (yellow ribbon). In the  
661 bottom panel, residues are colored according to their average positional fitness scores with 0  
662 representing null-like scores (red) and 1 representing wild type-like scores (blue).

663 (b) Average fitness score of all variants at each amino acid position (black line) overlaid with a  
664 smoothed summary curve (red). The dark blue region of the plot represents fitness scores less  
665 than 0.72 (over 10 times more likely to be damaging than tolerated) and the white region  
666 represents fitness scores over 0.81 (over 10 times more likely to be tolerated than damaging).  
667 [Tolerated:damaging odds ratios were calculated as described in methods]. The tracks above the  
668 plot represent: depiction of *GDI1* with sequence conserved regions (SCRs) common to all  
669 members of the GDI/CHM superfamily (top track) and; the secondary structures of human *GDI1*  
670 as predicted by PSIPRED 4.0 (44) (bottom track; black = helix, gray = strand).

671 (c) Average fitness scores of amino acid positions within non-conserved or "linker" regions  
672 versus sequence conserved regions. Significance level was determined using Wilcoxon signed-  
673 rank test.

674 (d) Region-wise comparison of average positional fitness scores. Wilcoxon signed-rank tests  
675 were performed comparing each region to the "C-terminus" region (red asterisks) and to SCR2  
676 (blue asterisks). Significance levels are denoted by: \* ( $p < 0.05$ ), \*\* ( $p < 0.01$ ), \*\*\* ( $p < 0.001$ ), and  
677 \*\*\*\* ( $p < 0.0001$ ).

678 e) Center: Ribbon representation of human *GDI1* modeled on the structure of *S. cerevisiae*  
679 RabGDP-dissociation inhibitor in complex with prenylated YPT1 GTPase (yellow).  
680 *GDI1* residues are colored by average positional fitness score. Left: side chains of all



681 hydrophobic residues within 5A of the geranylgeranyl group (orange). Right: side chains of  
 682 residues comprising the mobile effector loop and proximal beta strand.  
 683

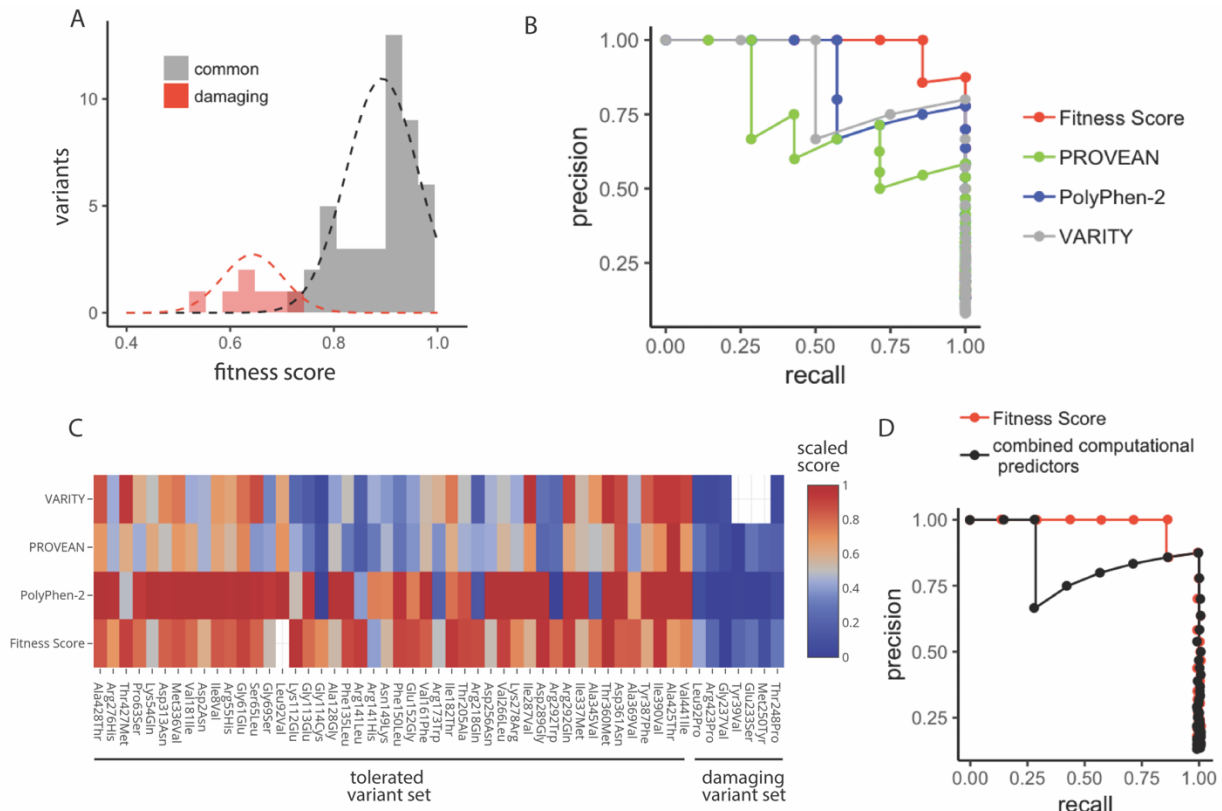

684  
 685 **Figure 4: *GDI1* variant effect map separates damaging and common variants with higher**  
 686 **precision than current computational methods**  
 687 (a) Distribution of fitness scores for known damaging and known common (presumed tolerated)  
 688 *GDI1* missense variants. Common variants are comprised of 46 missense variants listed in  
 689 gnomAD which have been observed in at least one hemizygous individual.  
 690 (b) Precision-recall curve for our fitness scores compared to various computational methods for  
 691 variant interpretation. A sliding threshold was used for each score type starting at the lowest  
 692 score; variants below this threshold were called as damaging. For each threshold value, the  
 693 number of true damaging variants identified (true positives) and the number of benign variants

694 identified in error (false positives) was evaluated. The precision [true positives/(true positives +  
 695 false positives)] versus the recall [true positives/(true positives + false negatives)] is shown for  
 696 each threshold value.

697 c) Scaled fitness scores and computational predictor scores for all variants from our tolerated and  
 698 damaging variant sets. Scores were scaled such that all score types range from 0 to 1 with 0  
 699 representing most damaging and 1 representing most tolerated.

700 d) Precision recall curves for our fitness scores and for a “combined computational predictor  
 701 score” which is the median of scaled PolyPhen-2, PROVEAN, and VARITY scores (scaling was  
 702 performed as described in c).

| Variant | ClinVar annotation          | fitness score | imputed score | standard error | conclusion  |
|---------|-----------------------------|---------------|---------------|----------------|-------------|
| R35W    | Uncertain significance      | 0.63          | 0.63          | 0.03           | deleterious |
| G40V    | Uncertain significance      | 0.10          | 0.11          | 0.05           | deleterious |
| S65T    | Uncertain significance      |               | 0.78          | 0.15           | unknown     |
| S65L    | Uncertain significance      | 1.07          | 0.91          | 0.05           | tolerated   |
| L76V    | Uncertain significance      |               | 0.71          | 0.20           | unknown     |
| L92P    | Uncertain significance      | 0.74          | 0.74          | 0.03           | unknown     |
| G113E   | Uncertain significance      | 0.91          | 0.90          | 0.03           | tolerated   |
| A128G   | Uncertain significance      |               | 0.79          | 0.14           | unknown     |
| R138W   | Uncertain significance      | 0.87          | 0.87          | 0.04           | unknown     |
| F158S   | Likely pathogenic           | 0.88          | 0.87          | 0.03           | tolerated   |
| Y192C   | Uncertain significance      | 0.99          | 0.99          | 0.02           | tolerated   |
| R193H   | Uncertain significance      | 1.06          | 0.94          | 0.02           | tolerated   |
| R193L   | Uncertain significance      | 0.92          | 0.91          | 0.04           | tolerated   |
| G237V   | Uncertain significance      | 0.55          | 0.55          | 0.07           | deleterious |
| D289H   | Uncertain significance      |               | 0.77          | 0.19           | unknown     |
| R290S   | Uncertain significance      | 0.17          | 0.20          | 0.05           | deleterious |
| R290H   | Uncertain significance      | 0.95          | 0.95          | 0.03           | tolerated   |
| V381E   | Uncertain significance      | 0.19          | 0.36          | 0.17           | deleterious |
| T413A   | Likely benign               | 1.15          | 0.87          | 0.01           | tolerated   |
| R423P   | Pathogenic                  |               | 0.64          | 0.24           | unknown     |
| T427M   | Conflicting interpretations | 0.97          | 0.96          | 0.04           | tolerated   |
| A428V   | Uncertain significance      | 1.16          | 0.86          | 0.03           | tolerated   |

703

704 **Figure 5: Interpretation of clinically-relevant GDI1 missense variants from the ClinVar**  
705 **database**

706 Fitness scores (experimentally measured where available, and computationally imputed for all  
707 variants) are listed for all GDI1 missense variants listed on ClinVar. We concluded that a variant  
708 is “deleterious” where the damaging:tolerated odds ratio was greater than 1:10 and vice versa for  
709 “tolerated” variants.

710

711 **Supplemental Information**

712 **Supplemental Figures and Legends**

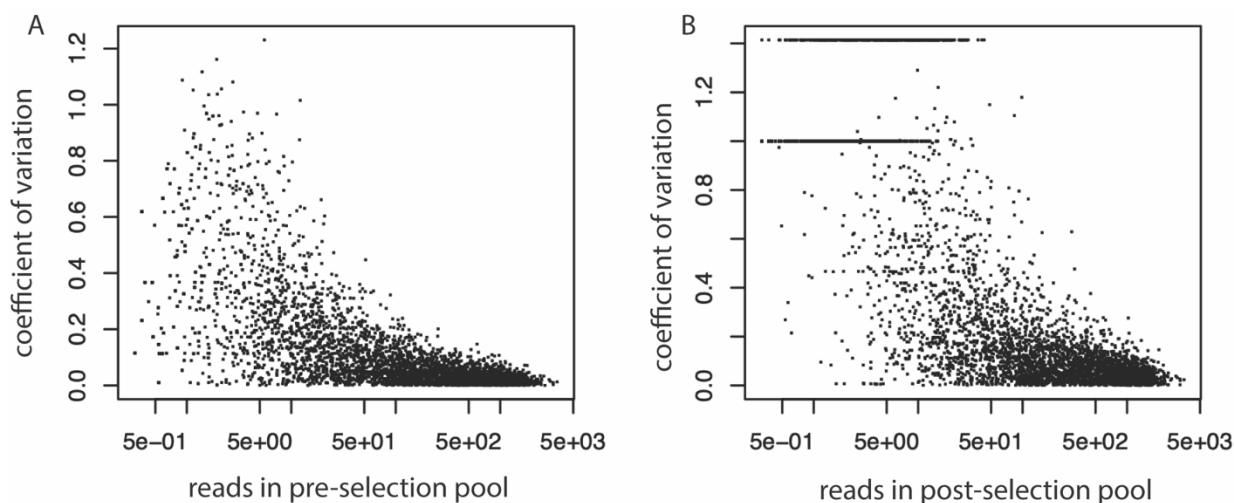

715 **Figure S1: Variants present at low frequencies in complementation screen show poorer**  
716 **agreement between replicates**

717 a) Coefficient of variation between two read count replicates for all detected variants in the pre-  
718 selection pool versus frequency in the pre-selection pool (as measured by mean read count of the  
719 two replicates).

720 b) Coefficient of variation between two read count replicates for all detected variants in the post-  
721 selection pool versus frequency in the post-selection pool (as measured by mean read count of  
722 the two replicates).

723

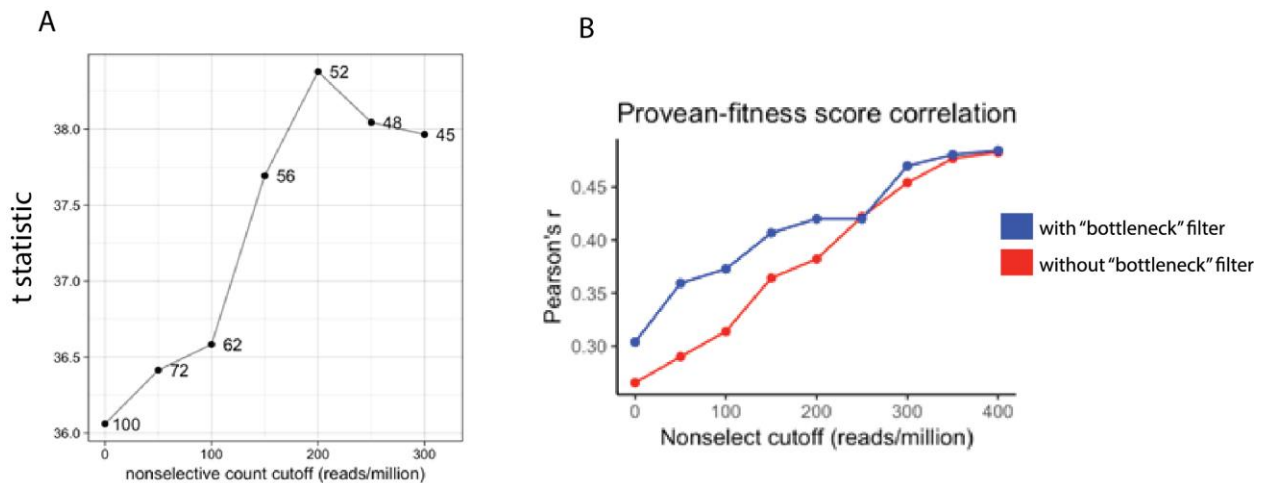

724

725 **Figure S2: Filtering out variants present at low frequencies in the pre-selection pool**  
726 **improves metrics of fitness measurement accuracy**

727 a) Multiple read count cut-offs were tested wherein read counts in the pre-selection pool were  
728 filtered to include only high-frequency variants (present at frequencies greater than the cut-off  
729 value). For each cut-off value tested, a two-sample t-statistic was calculated to evaluate the  
730 separation of fold changes between nonsense variants and synonymous variants. A cut-off value  
731 of 200 reads/million maximized the separation of synonymous and nonsense variants.

732 b) Correlation between PROVEAN scores and our fitness scores increase as variants are filtered  
733 for higher frequency in the pre-selection variant pool. For each read count cutoff, the correlation  
734 (Pearson's R) between our calculated fitness score (prior to imputation) and PROVEAN scores  
735 for all missense variants was calculated.

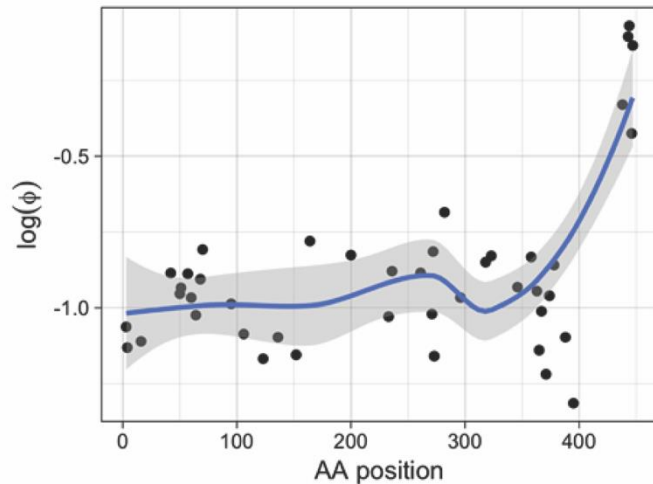

736

737 **Figure S3: Fold changes (pre-selection/post-selection) of all measured nonsense mutations**

738 **in *GDI1***

739 Nonsense mutations after amino acid position 400 lead to less severe loss of complementation.

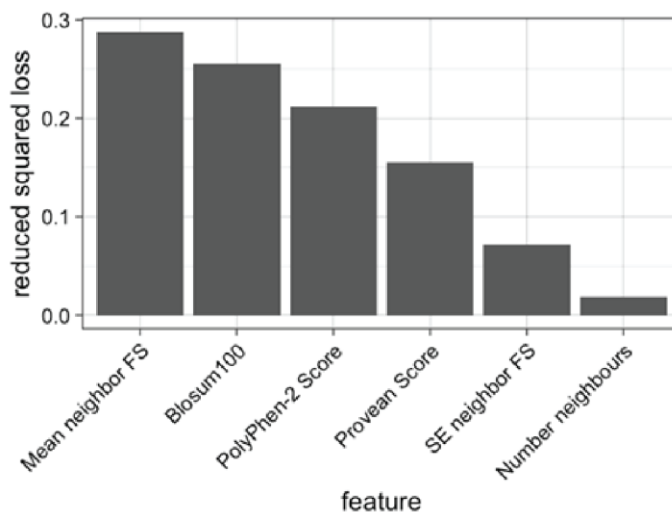

740

741 **Figure S4: Feature importance for gradient boosted trees imputation model**

742 Mean neighbor FS: the mean fitness scores of the 3 most similar amino acids at the same residue

743 position. SE neighbor FS: Standard error of the fitness scores of the 3 most similar amino acids

744 at the same residue position. Number neighbours: Number of variants measured at the same amino

745 acid position

746

747 **Descriptions of Supplementary Tables**

748 **Table S1: Table of raw yeast complementation data**

749 Table of unfiltered *GDII* variant frequencies in pre- and post- selection deep sequencing pools.

750 Variants counts are presented in reads/million.

751 **Table S2: Fitness score table**

752 Table of fitness score data calculated for all well-measured *GDII* variants.

753 **Table S3: Imputed scores**

754 Table of all fitness scores including computationally imputed scores for amino acid substitutions

755 not measured experimentally.
